# Supplementary material
Source: PubMed Central journal article supplement (PMC7489913)
Supplement: supp_RA120.012849_158507_2_supp_566611_qdrthv.pdf [file supp_RA120.012849_158507_2_supp_566611_qdrthv.pdf]

## Tectorigenin enhances PDX1 expression and protects pancreatic $\beta$ -cells by activating ERK and reducing ER stress

Xinlei Yao<sup>1,2</sup>, Kun Li<sup>1</sup>, Chen Liang<sup>1</sup>, Zilong Zhou<sup>1</sup>, Jiao Wang<sup>2</sup>, Shuyue Wang<sup>2</sup>, Lei Liu<sup>2</sup>, Chun-Lei Yu<sup>1</sup>, Zhen-Bo Song<sup>2</sup>, Yong-Li Bao<sup>1</sup>, Li-Hua Zheng<sup>1</sup>, Ying Sun<sup>2</sup>, Guannan Wang<sup>2</sup>, Yanxin Huang<sup>1</sup>, Jingwen Yi<sup>2</sup>, Luguo Sun<sup>1\*</sup> & Yuxin Li<sup>2\*</sup>

### Supporting Information

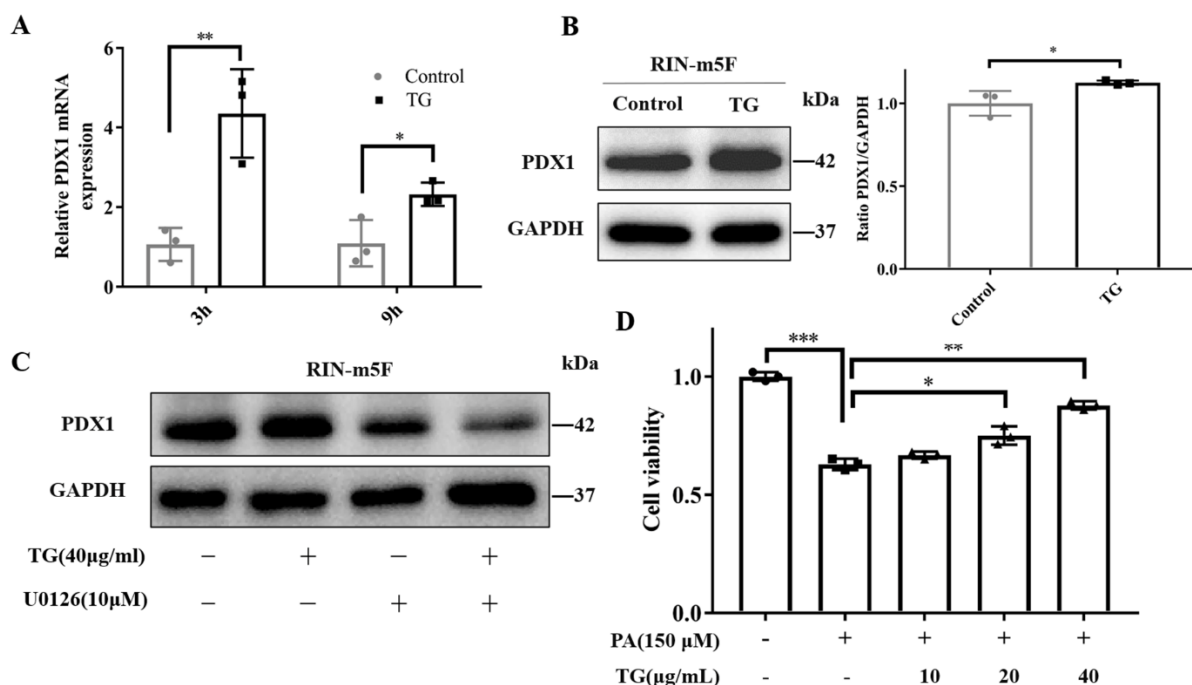

**Figure S1. TG promotes PDX1 expression in RIN-m5F cells by activating ERK and improves the viability of RIN-m5F cells under lipotoxicity. (A)** RT-qPCR analysis of mRNA levels of PDX1 in untreated or 40  $\mu$ g/ml TG-treated RIN-m5F cells for 3 h or 9 h. **(B)** Western blot analysis of PDX1 protein in RIN-m5F cells with or without 40  $\mu$ g/ml TG treatment for 24 h. Image J software was used for quantitative analysis. **(C)** Western blot analysis of PDX1 protein in RIN-m5F cells with combined treatment as indicated. **(D)** Cell viability of PA-treated RIN-m5F cells with or without TG treatment. Error bars represent  $\pm$  SD. \*  $p < 0.05$ ; \*\*  $p < 0.01$ ; \*\*\*  $p < 0.001$
